# Supplementary material for: Prevalence of nasal colonisation by methicillin-sensitive and methicillin-resistant Staphylococcus aureus among healthcare workers and students in Madagascar
Source: Springer Nature journal article supplement (doi:10.1186/s12879-016-1733-6), 2016-08-15
Supplement: MOESM1 [file 10584898]

**Supporting Information Table 1.** Primers used for PCR screening of nasal *S. aureus* isolates obtained from Madagascan students and healthcare workers.

| Primer                    | Target gene               | PCR product size (bp <sup>a</sup> ) | Sequence 5' to 3'               | References                          |
|---------------------------|---------------------------|-------------------------------------|---------------------------------|-------------------------------------|
| nuc1                      | nuc                       | 279                                 | GCG ATT GAT GGT GAT ACG GTT     | Zhang K et al 2004 <sup>1</sup>     |
| nuc2                      |                           |                                     | AGC CAA GCC TTG ACG AAC TAA AGC |                                     |
| mecA <sub>LGA251</sub>    | FP mecA <sub>LGA251</sub> | 356                                 | TCACCAGGTTCAAC[Y]CAAAA          | Stegger M et al 2012 <sup>2</sup>   |
| mecA <sub>LGA251</sub> RP |                           |                                     | CCTGAATC[W]GCTAATAATATTTTC      |                                     |
| pvl-FP                    | lukF-PV                   | 83                                  | GCTGGACAAAACCTTCTTGAATAT        | Stegger M et al 2012 <sup>2</sup>   |
| pvl-RP                    |                           |                                     | GATAGGACACCAATAAATTCTGGATTG     |                                     |
| Tst-F                     | TSST-1                    | 445                                 | AAG CCC TTT GTT GCT TGC G       | Becker K et al 1998 <sup>3</sup>    |
| Tst-R                     |                           |                                     | ATC GAA CTT TGG CCC ATA CTT T   |                                     |
| MecAP4                    | MecA                      | 162                                 | TCCAGATTACAACCTTCACCAGG         | Oliveira DC et al 2002 <sup>4</sup> |
| MecAP7                    |                           |                                     | CCACTTCATATCTTGTAACG            |                                     |
| MecC-F                    | Mec <sub>LGA251</sub>     | 304                                 | GCTCCTAATGCTAATGCA              | Cuny C et al 2011 <sup>5</sup>      |
| MecC-R                    |                           |                                     | TAAGCAATAATGACTACC              |                                     |

<sup>a</sup>Base pairs.

## References

1. Zhang K, Sparling J, Chow BL, Elsayed S, Hussain Z, Church DL, et al. New quadriplex PCR assay for detection of methicillin and mupirocin resistance and simultaneous discrimination of *Staphylococcus aureus* from coagulase-negative staphylococci. *Journal of clinical microbiology* 2004;42(11):4947-55.
2. Stegger M, Andersen PS, Kearns A, Pichon B, Holmes MA, Edwards G, et al. Rapid detection, differentiation and typing of methicillin-resistant *Staphylococcus aureus* harbouring either *mecA* or the new *mecA* homologue *mecA(LGA251)*. *Clinical microbiology and infection: the official publication of the European Society of Clinical Microbiology and Infectious Diseases* 2012;18(4):395-400.
3. Becker K, Roth R, Peters G. Rapid and specific detection of toxigenic *Staphylococcus aureus*: use of two multiplex PCR enzyme immunoassays for amplification and hybridization of staphylococcal enterotoxin genes, exfoliative toxin genes, and toxic shock syndrome toxin 1 gene. *Journal of clinical microbiology* 1998;36(9):2548-53.
4. Oliveira DC, de Lencastre H. Multiplex PCR strategy for rapid identification of structural types and variants of the *mec* element in methicillin-resistant *Staphylococcus aureus*. *Antimicrobial agents and chemotherapy* 2002;46(7):2155-61.
5. Cuny C, Layer F, Strommenger B, Witte W. Rare occurrence of methicillin-resistant *Staphylococcus aureus* CC130 with a novel *mecA* homologue in humans in Germany. *PloS one* 2011;6(9):e24360.
